# Supplementary material for: Alteration of immunoproteasome mRNA in PBMCs of patients with Parkinson’s disease
Source: Research Square preprint supplement (doi:10.21203/rs.3.rs-2133586/v1), 2022-10-07
Supplement: Supplementary file 1 [file 4645cee835e831fee897c91f.docx]

**Supplements**

Table S1: Primers for the quantitative polymerase chain reaction assay

| Targets | Primers | Primer sequence |
| --- | --- | --- |
| GAPDH | Forward | TGG ACC TGA CCT GCC GTC TA |
| Reverse | CCC TGT TGC TGT AGC CAA ATT C |
| PSMB8 | Forward | CAC GGG TAG TGG GAA CAC TTA |
| Reverse | ACT TTC ACC CAA CCA TCT TCC |
| PSMB9 | Forward | CAT GGG ATA GAA CTG GAG GAA C |
| Reverse | CAC ACC GGC AGC TGT AAT A |
| PSMB10 | Forward | CTT GTC TGG CCG ACT CATC |
| Reverse | GAT CTT CTC GCA GCT CTT GT |

Table S2: Clinical characteristics of the HC and PD groups

| Variables | HCs | PD | | |
| --- | --- | --- | --- | --- |
| Total | Drug-naïve PD | Drug-treated PD |
| Age | 67.42 ± 7.98 | 69.97 ± 8.62 | 69.52 ± 8.82 | 70.92 ± 8.46 |
| Sample (n) | 19 | 40 | 27 | 13 |
| Disease duration (years) | - | 2.71 ± 3.12 | 1.50 ±1.53 | 5.21 ± 4.03## |
| H&Y | - | 2.51 ± 0.80 | 2.44±0.79 | 2.65 ± 0.85 |
| MDS-UPDRS III score: | - | 38.94 ± 14.69 | 36.63 ±14.53 | 38.94 ± 14.69 |
| UPDRS score: | - | 58.96 ± 25.31 | 53.07± 23.89 | 71.19 ± 24.60# |

Data are shown as mean ± SD.

#, ##, and ### represent p < .05, .01, and .001, respectively, when comparing between drug-naïve PD and drug-treated PD. HC, healthy controls; PD, Parkinson’s disease

Figure S3. Levels of immunoproteasome PSMB9 and PSMB10 mRNA in the PBMCs of PD subgroups compared with the HC group.

(A, B) PSMB8 and PSM10 mRNA levels of drug-naïve PD and drug-treated PD subgroups were compared with those of the HC group.

(C, D) PSMB9 and PSMB10 mRNA levels of mild PD and moderate-to-severe PD subgroups were compared with those of the HC group.

HC, healthy controls; PD, Parkinson’s disease

Figure S4: ROC curve of ratio PSMB10/8 for the discrimination of PD (blue curve) or mild PD group (red curve) from the HC group; HC, healthy controls; PD, Parkinson’s disease

Figure S5. Correlation between the clinical scores and expression levels of PSMB8 mRNA
